# Supplementary material for: One-step synthesis of poly(methacrylate)-b-polyester via “one organocatalyst, two polymerizations”
Source: Royal Society of Chemistry journal article supplement (doi:10.1039/d1py00892g), 2021-01-01
Supplement: d1py00892g1.pdf [file d1py00892g1.pdf]

## Supplementary Information

### **“One-step” synthesis of poly(methacrylate)-*b*-polyester via “one organocatalyst, two polymerizations”**

Mengmeng Li<sup>‡</sup>, Lin Zhou<sup>‡</sup>, Ziqi Zhang, Qi Wang, Jiani Gao, Shiping Zhang, Lin Lei\*

*Key Laboratory of Synthetic and Natural Functional Molecular Chemistry of the Ministry of Education, College of Chemistry and Materials Science, Northwest University, Xi'an, 710127, P. R. China.*

*Corresponding Author: [leil@nwu.edu.cn](mailto:leil@nwu.edu.cn)*

## **Contents**

### ***Figures***

*Figure S1* the picture of LED light (the distance between the LED light and the Schlenk tube is 4 centimeters).

*Page 4*

*Figure S2* GPC traces of PMMA and block copolymer PMMA-*b*-PTMC (entry 1, Table 1).

*Page 4*

*Figure S3* GPC traces of PMMA and block copolymer PMMA-*b*-PTMC (entry 2, Table 1).

*Page 5*

*Figure S4* The number-average molecular weight ( $M_{n, GPC}$ ) and PDI versus monomer conversion of block copolymer PMMA-*b*-PTMC.

*Page 5*

*Figure S5*  $^1\text{H}$  DOSY NMR spectrum of the block copolymer PMMA-*b*-PVL was synthesized via a “one-pot, one step” (entry 4, Table 2).

*Page 6*

*Figure S6* The number-average molecular weight ( $M_{n, GPC}$ ) and PDI versus monomer conversion of block copolymer PMMA-*b*-PVL.

*Page 6*

*Figure S7* GPC trace of block copolymer PBzMA-*b*-PTMC was synthesized via “one-pot, one step” (entry 5, Table 2).

*Page 7*

*Figure S8* GPC trace of block copolymer PBzMA-*b*-PVL was synthesized via “one-pot, one step” (entry 6, Table 2).

*Page 7*

*Figure S9*  $^1\text{H}$  NMR spectrum of block copolymer PBzMA-*b*-PTMC was synthesized via “one-pot, one step” (entry 5, Table 2).

*Page 8*

*Figure S10*  $^1\text{H}$  NMR spectrum of block copolymer PBzMA-*b*-PVL was synthesized via “one-pot, one step” (entry 6, Table 2).

*Page 8*

*Table S1* Photo-ATRP of MMA only or ROP of TMC only.

*Page 9*

*Table S2* Photo-ATRP of MMA only or ROP of  $\delta$ -VL only.

*Page 9*

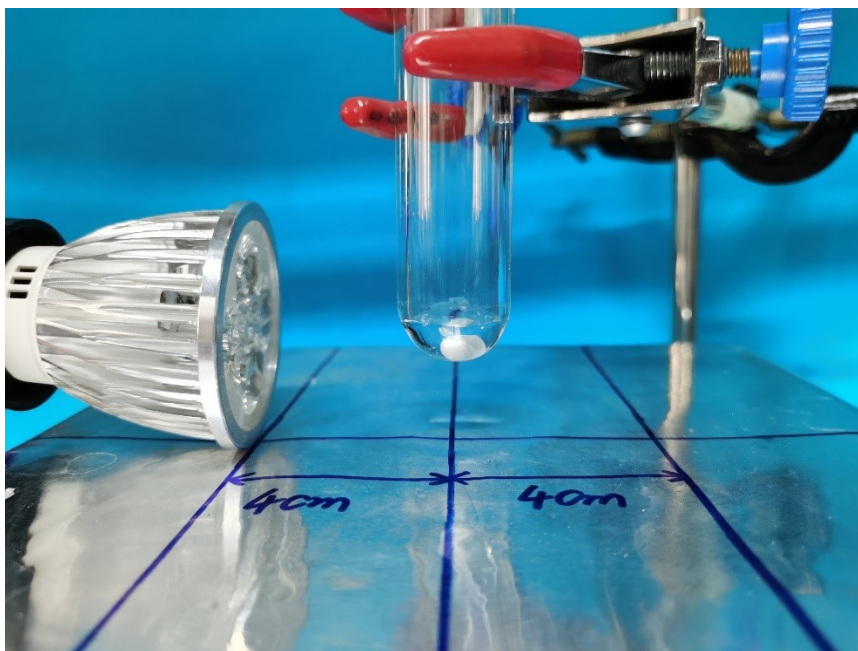

Figure S1 the picture of LED-light (the distance between the LED and the Schlenk tube is 4 centimeters).

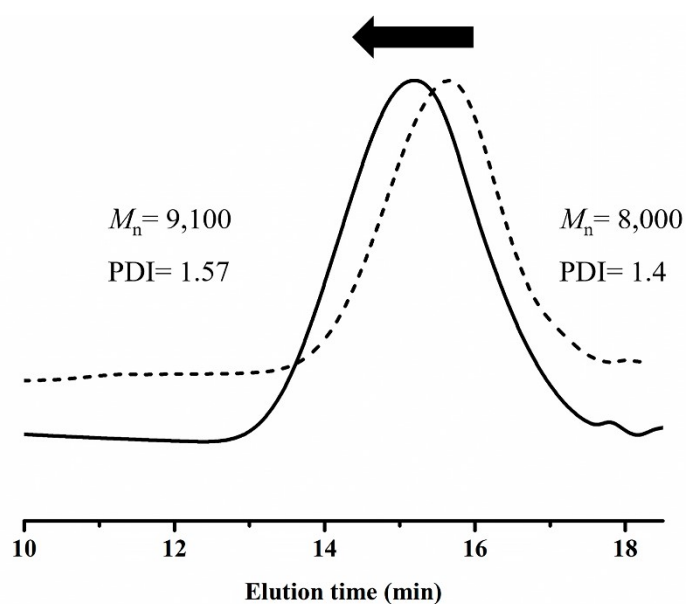

Figure S2 GPC traces of PMMA and block copolymer PMMA-*b*-PTMC (entry 1, Table 1).

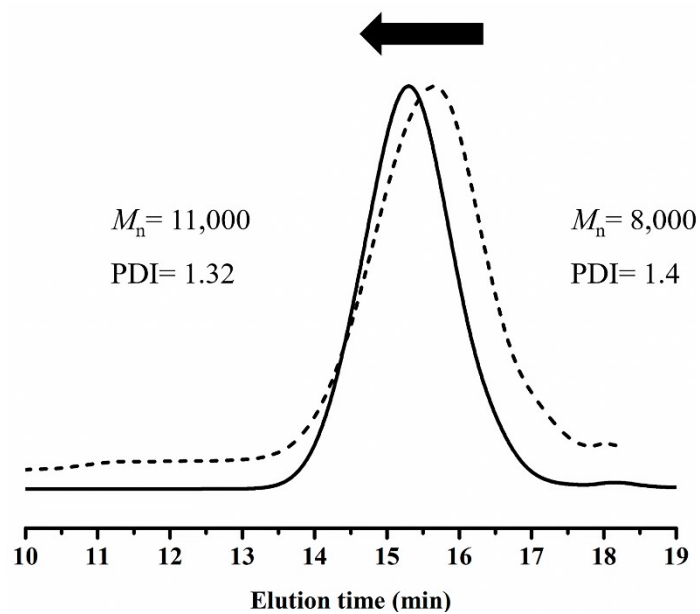

Figure S3 GPC traces of PMMA and block copolymer PMMA-*b*-PTMC (entry 2, Table 1).

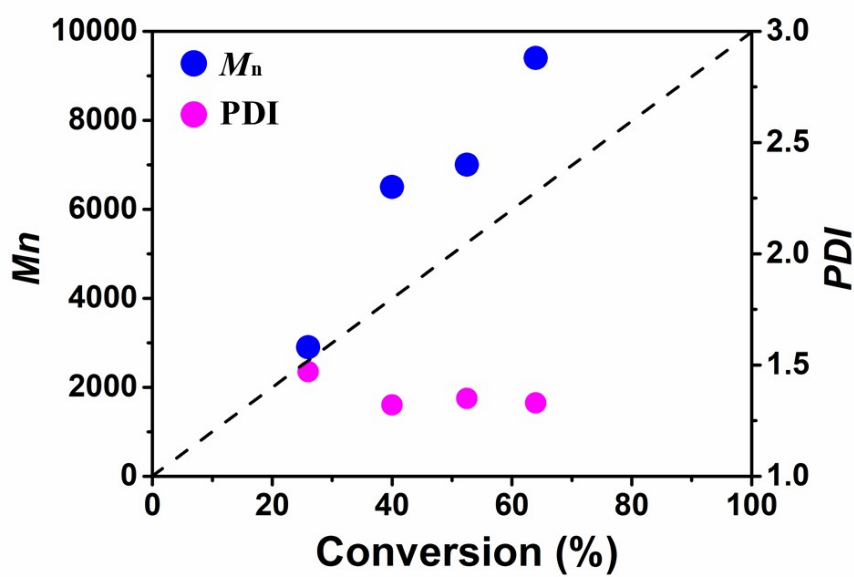

Figure S4 The number-average molecular weight ( $M_{n, \text{GPC}}$ ) and PDI versus monomer conversion of block copolymer PMMA-*b*-PTMC.

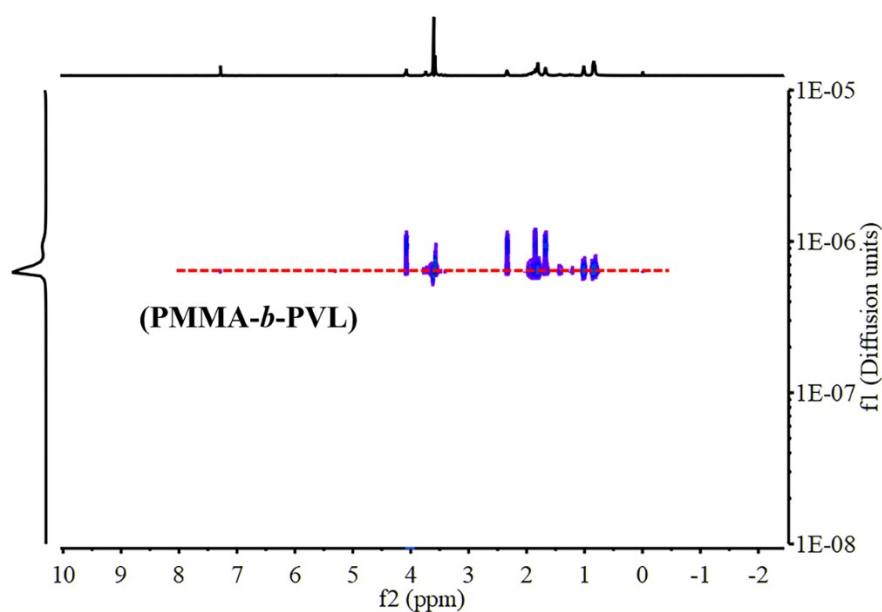

Figure S5  $^1\text{H}$  DOSY NMR spectrum of the block copolymer PMMA-*b*-PVL was synthesized via “one-pot, one step” (entry 4, Table 2).

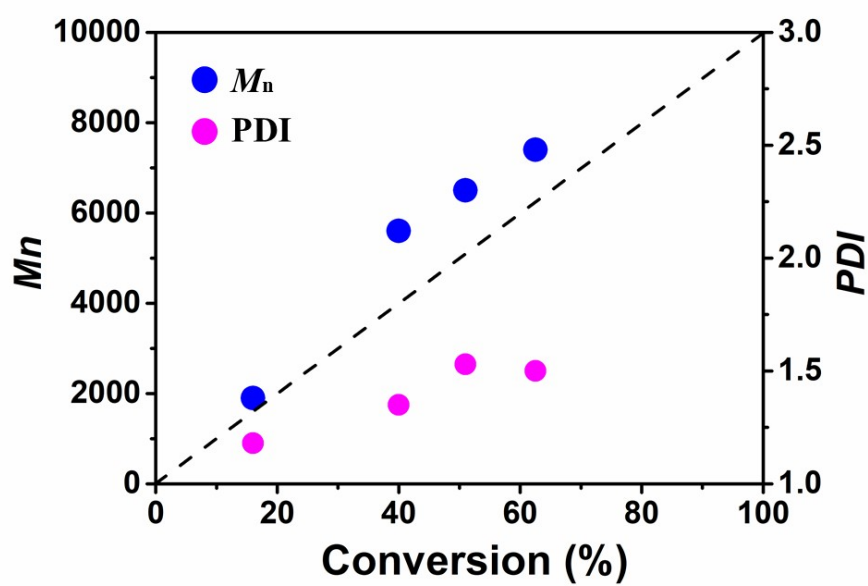

Figure S6 The number-average molecular weight ( $M_{n,\text{GPC}}$ ) and PDI versus monomer conversion of block copolymer PMMA-*b*-PVL.

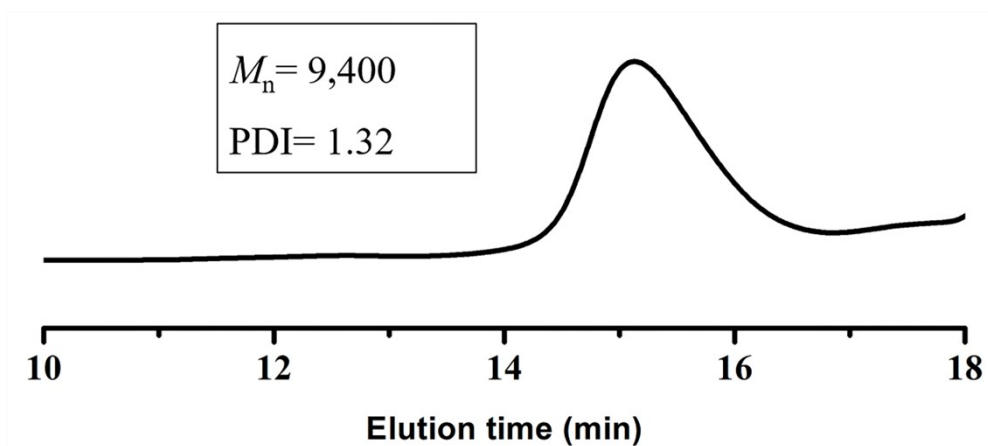

Figure S7 GPC trace of block copolymer PBzA-*b*-PTMC was synthesized via “one-pot, one step” (entry 5, Table 2).

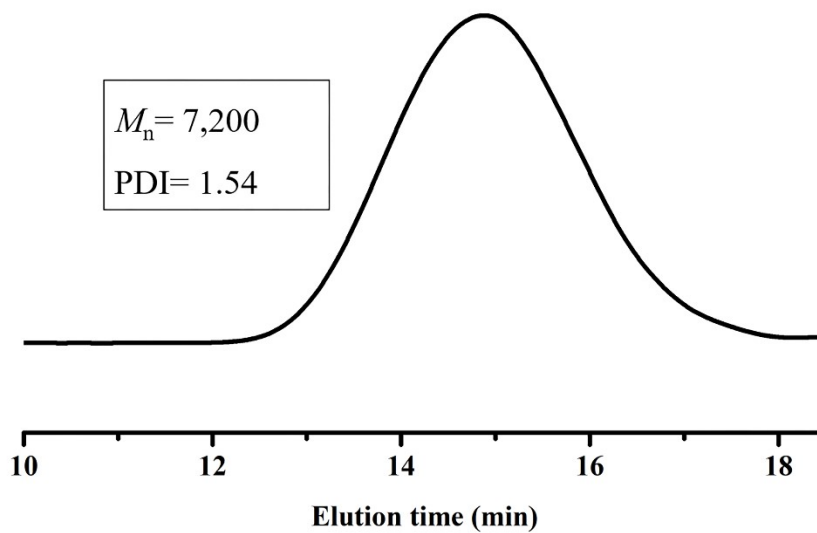

Figure S8 GPC trace of block copolymer PBzMA-*b*-PVL was synthesized via “one-pot, one step” (entry 6, Table 2).

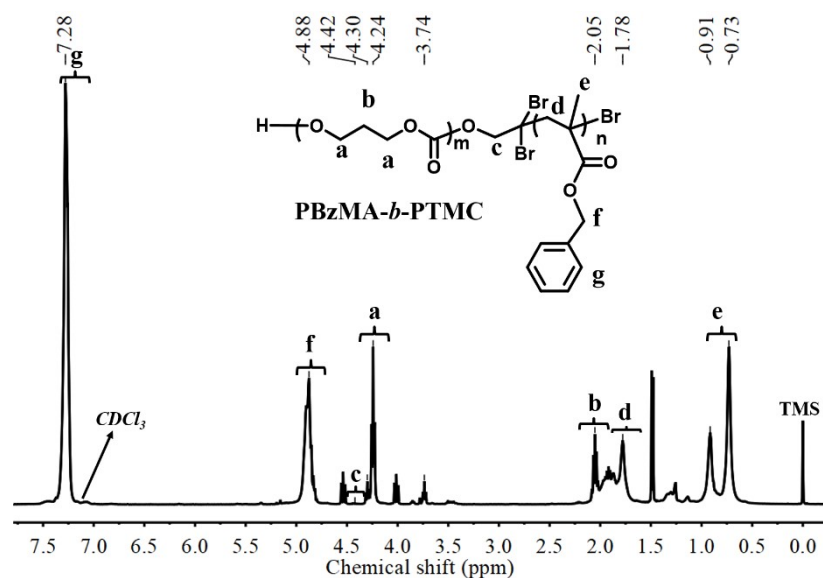

Figure S9  $^1\text{H}$  NMR spectrum of block copolymer PBzMA-*b*-PTMC was synthesized via “one-pot, one step” (entry 5, Table 2).

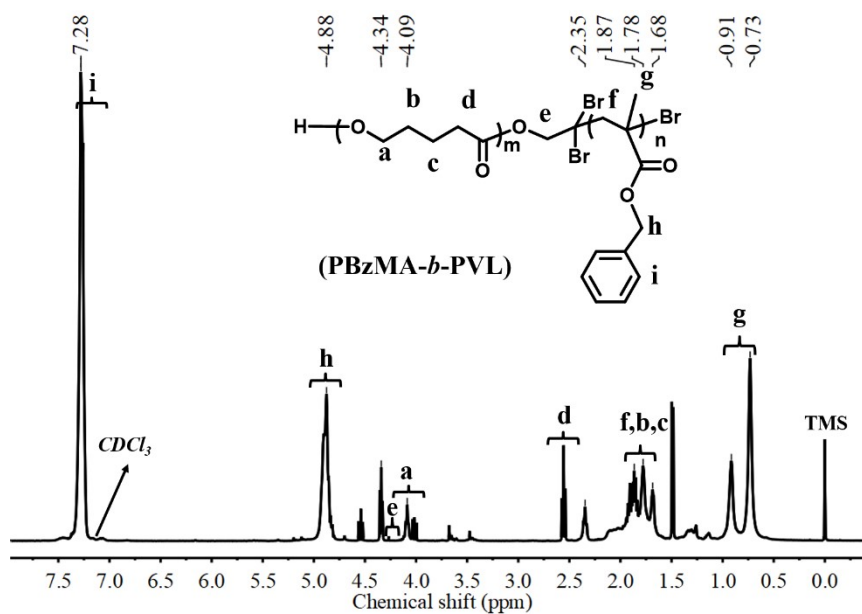

Figure S10  $^1\text{H}$  NMR spectrum of block copolymer PBzMA-*b*-PVL was synthesized via “one-pot, one step” (entry 6, Table 2).

*Table S1* Photo-ATRP of MMA only or ROP of TMC only.

| Entry | Monomer | [M]/[TBE]<br>/[THS] (mM) | <i>t</i> (h) | Conv. (%) |
|-------|---------|--------------------------|--------------|-----------|
| 1     | MMA     | 50/1/1                   | 2            | 8         |
|       |         |                          | 4            | 18        |
|       |         |                          | 6            | 35        |
|       |         |                          | 8            | 41        |
|       |         |                          | 10           | 51        |
| 2     | TMC     | 50/1/1                   | 4            | 7         |
|       |         |                          | 6            | 15        |
|       |         |                          | 8            | 20        |
|       |         |                          | 10           | 27        |

*Table S2* Photo-ATRP of MMA only or ROP of  $\delta$ -VL only.

| Entry | Monomer      | [M]/[TBE]<br>/[THS] (mM) | <i>t</i> (h) | Conv. (%) |
|-------|--------------|--------------------------|--------------|-----------|
| 1     | MMA          | 50/1/0.5                 | 4            | 20        |
|       |              |                          | 6            | 27        |
|       |              |                          | 8            | 36        |
|       |              |                          | 10           | 52        |
| 2     | $\delta$ -VL | 50/1/0.5                 | 4            | 9         |
|       |              |                          | 6            | 18        |
|       |              |                          | 8            | 27        |
|       |              |                          | 10           | 40        |
